# Supplementary material for: Robust profiling of microRNAs and isomiRs in human plasma exosomes across 46 individuals
Source: PubMed Central journal article supplement (PMC6934752; doi:10.1038/s41598-019-56593-7), 2019-12-27
Supplement: 41598_2019_56593_MOESM1_ESM.pdf [file 41598_2019_56593_MOESM1_ESM.pdf]

## **Supplementary Figures**

### **Robust profiling of microRNAs and isomiRs in human plasma exosomes across 46 individuals**

Tommy A. Karlsen<sup>1\*</sup>, Tommy F. Aae<sup>2</sup> Jan E. Brinchmann<sup>1,3</sup>

<sup>1</sup>Department of Immunology, Oslo University Hospital Rikshospitalet, PO Box 4950 Nydalen, 0424 Oslo, Norway

<sup>2</sup> Department of Orthopedic Surgery, Kristiansund Hospital, 6518, Kristiansund, Norway.

<sup>3</sup>Department of Molecular Medicine, Faculty of Medicine, University of Oslo, PO Box 1078 Blindern, 0316 Oslo, Norway

**Supplementary Fig. S1.**

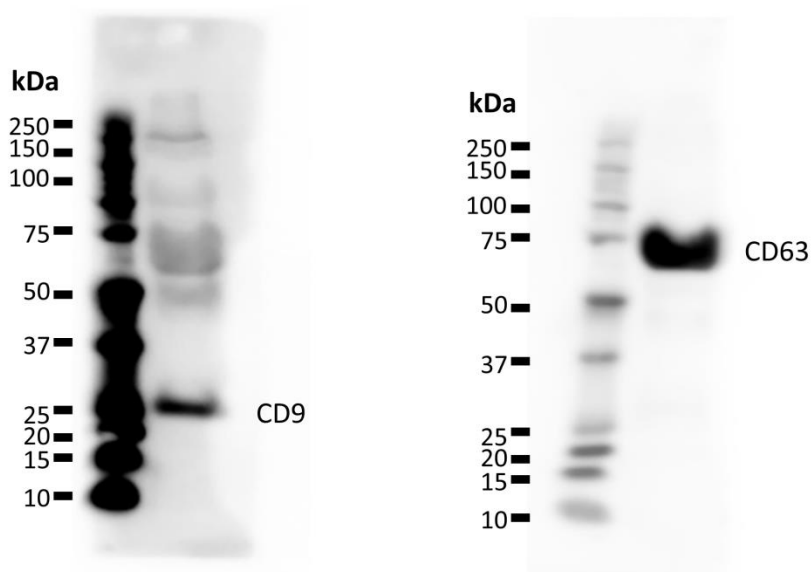

**Supplementary Fig. S1.** Unprocessed images of western blots of CD9 and CD63. Size markers for the ladder are inserted at the left side of each blot.

**Supplementary Fig. S2**

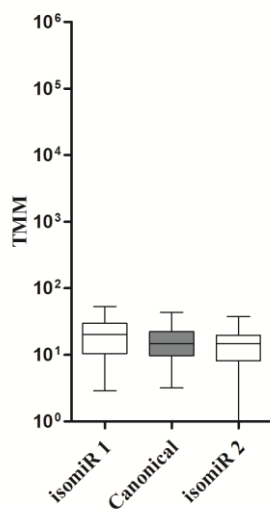

**Supplementary Fig. S2.** Expression levels of canonical miR-628-3p and two isomiRs: isomiR 1 and isomiR 2. TMM = Trimmed mean of M-values normalization.
